# Supplementary material
Source: Springer Nature journal article supplement (https://www.springermedizin.de/resource/supplementary/12939_2009_140_MOESM1_ESM.pdf/9551570)

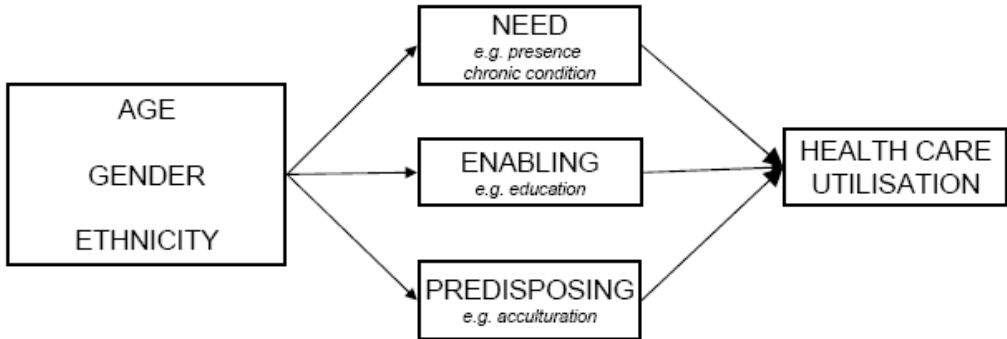

*specific determinants  
cf. Andersen's model*

Supplement: MOESM1 [file 9551570]
